# Supplementary material
Source: Springer Nature journal article supplement (https://www.springermedizin.de/resource/supplementary/12891_2011_1247_MOESM3_ESM.pdf/9507456)

Increase in likelihood of  
invalidation of diagnosis

Increase in likelihood of  
confirmation of diagnosis

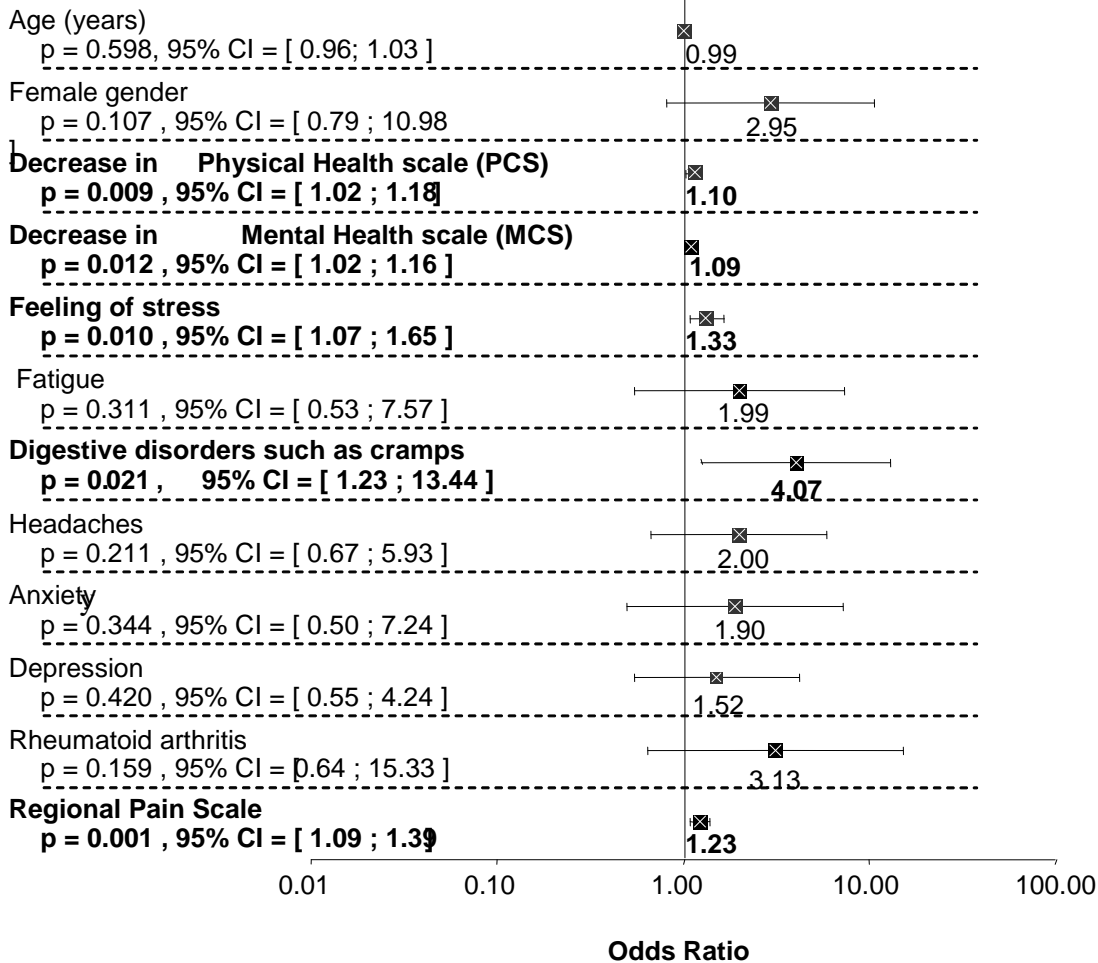

Supplement: MOESM3 [file 9507456]
